# Supplementary material
Source: Springer Nature journal article supplement (https://www.springermedizin.de/resource/supplementary/12879_2012_1979_MOESM1_ESM.pdf/9443404)

**a**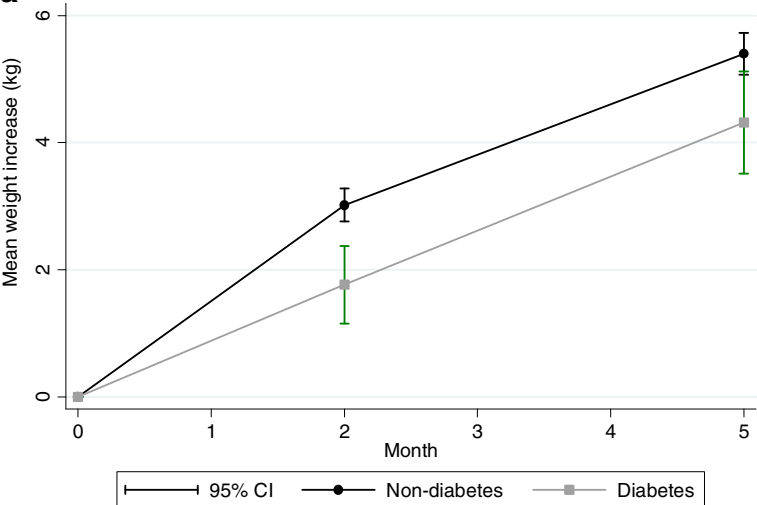**b**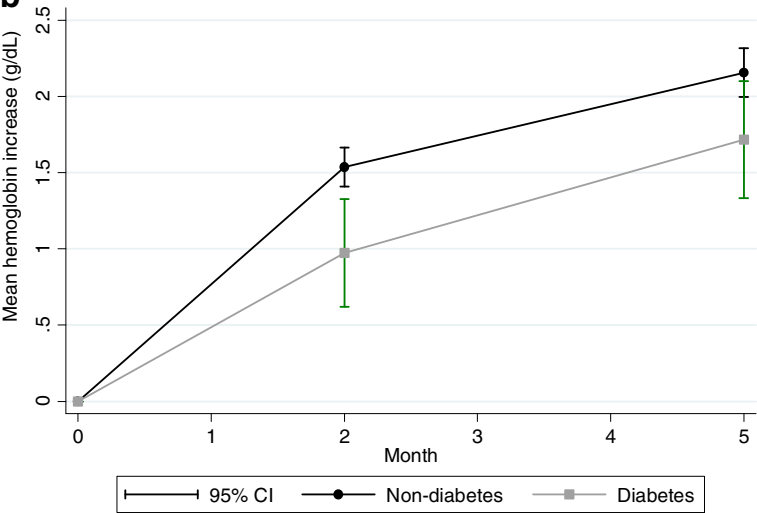

Supplement: MOESM1 [file 9443404]
